# Supplementary material for: Morphological adaptability of graphitic carbon nanofibers to enhance sodium insertion in a diglyme-based electrolyte
Source: Royal Society of Chemistry journal article supplement (doi:10.1039/c9dt00563c), 2019-01-01
Supplement: c9dt00563c1.pdf [file c9dt00563c1.pdf]

Supporting information

## Morphological adaptability of graphitic carbon nanofibers to enhance sodium insertion in a diglyme-based electrolyte

Francisco Nacimiento, Marta Cabello, Gregorio F. Ortiz\*, Ricardo Alcántara, Pedro Lavela and José L. Tirado

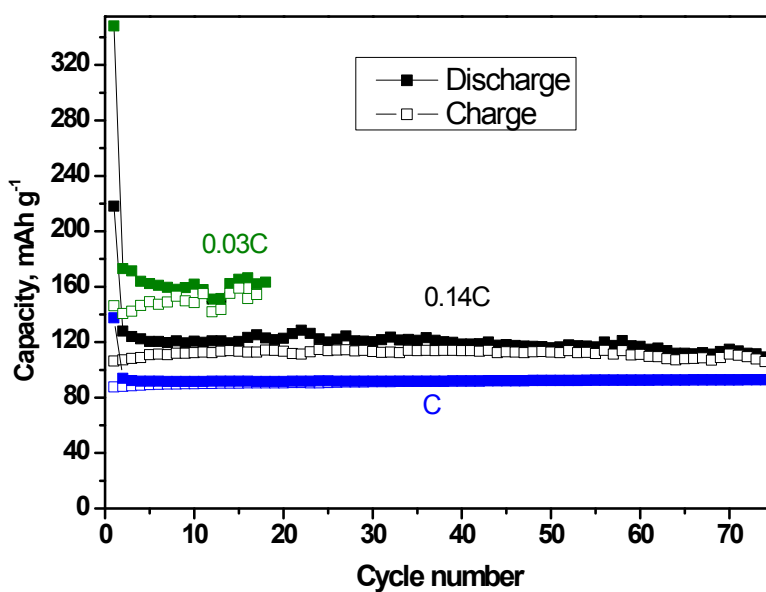

**Figure S1.** Electrochemical tests for galvanostatic cycling of Na/CNF half cells. The figure represents the Gravimetric capacity versus cycle number at C/7, C/33 C rates. Voltage limits: 0.03-3.0 V.

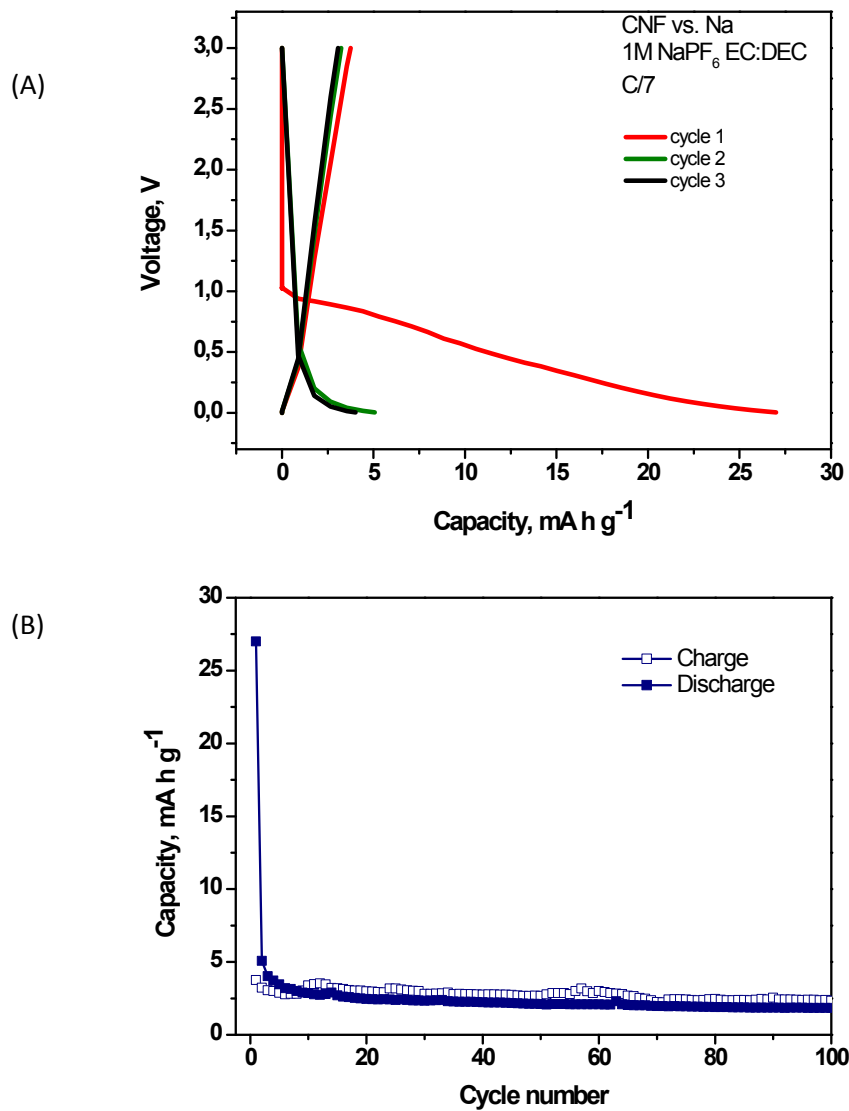

**Figure S2.** A) Galvanostatic discharge/charge curve of CNF in Na cell using 1M NaPF<sub>6</sub> in EC:DEC electrolyte. B) Its capacity retention
